# Supplementary material for: RAGE activation in macrophages and development of experimental diabetic polyneuropathy
Source: JCI journal article supplement (doi:10.1172/jci.insight.160555), 2022-12-07
Supplement: sd1 [file 1]

**Supplementary Table 1. Morphometric data on myelinated fibers of sciatic nerves**

| Group                            | Fiber area ( $\mu\text{m}^2$ ) | Axon area ( $\mu\text{m}^2$ ) | Myelin area ( $\mu\text{m}^2$ ) | Count number     | Count area ( $\mu\text{m}^2$ ) | Density (count number/mm <sup>2</sup> ) |
|----------------------------------|--------------------------------|-------------------------------|---------------------------------|------------------|--------------------------------|-----------------------------------------|
| 0 week WT-non DM (n=5)           | 11.1 $\pm$ 0.9                 | 4.8 $\pm$ 0.6                 | 6.3 $\pm$ 0.4                   | 553.0 $\pm$ 38.5 | 15293.2 $\pm$ 953.6            | 36326.6 $\pm$ 4355.6                    |
| 8 weeks after diabetic induction |                                |                               |                                 |                  |                                |                                         |
| WT-non DM (n=6)                  | 14.1 $\pm$ 1.6*                | 5.9 $\pm$ 0.7*                | 8.2 $\pm$ 0.9*                  | 526.0 $\pm$ 54.7 | 15378.0 $\pm$ 1900.7           | 34335.8 $\pm$ 1759.7                    |
| WT-DM (n=6)                      | 12.0 $\pm$ 1.0†                | 5.0 $\pm$ 0.5†                | 6.9 $\pm$ 0.8‡                  | 507.0 $\pm$ 72.5 | 14119.4 $\pm$ 1935.4           | 36055.8 $\pm$ 3743.2                    |
| 0 week RN-non DM (n=5)           | 11.2 $\pm$ 1.0                 | 4.7 $\pm$ 0.5                 | 6.7 $\pm$ 0.5                   | 526.0 $\pm$ 54.6 | 14420.6 $\pm$ 660.5            | 35120.4 $\pm$ 3749.2                    |
| 8 weeks after diabetic induction |                                |                               |                                 |                  |                                |                                         |
| RN-non DM (n=6)                  | 13.9 $\pm$ 1.6§                | 5.8 $\pm$ 0.7§                | 8.1 $\pm$ 1.0§                  | 509.8 $\pm$ 83.2 | 15167.8 $\pm$ 2588.0           | 33739.1 $\pm$ 2782.0                    |
| RN-DM (n=6)                      | 13.9 $\pm$ 1.6§,               | 5.8 $\pm$ 0.5§,               | 8.0 $\pm$ 0.8§,                 | 535.7 $\pm$ 49.1 | 14211.3 $\pm$ 2912.2           | 38530.9 $\pm$ 5616.3                    |

Values are expressed as means  $\pm$  SD. WT-non DM, non-diabetic wild-type mice; WT-DM, diabetic wild-type mice; RN-non DM, non-diabetic RAGE-null mice; RN-DM, diabetic RAGE-null mice; Statistical analysis was performed by one-way ANOVA with Turkey's multiple-comparison test. *P* Values < 0.05 were considered significant; \**p*<0.01 vs 0W WT-non DM, †*p*<0.01 vs WT, ‡*p*<0.05 vs WT, §*p*<0.01 vs 0W RN-non DM, ||*p*<0.05 vs WT-DM.

**Supplementary Table 2. List of chemicals and reagents used in this study**

| Chemical / Reagent name  | Catalog No.   | Vendor                                       | Experiments  | Concentration      |
|--------------------------|---------------|----------------------------------------------|--------------|--------------------|
| AGE-BSA (AGE)            | 2221-10       | BioVision Inc (CA, US))                      | Cell culture | 200 µg/mL          |
| HMBG1                    | 1690-HMB      | R&D Systems (MN, US)                         | Cell culture | 1.0 µg/mL          |
| Lipopolysaccharide (LPS) | 2630          | Merck KGaA (Darmstadt, Germany)              | Cell culture | 1.0 µg/mL          |
| BMS-754807               | HY-10200      | MedChemExpress (NJ, US)                      | Cell culture | 300 and 500 nmol/L |
| TNFα                     | 410-MT        | R&D Systems (MN, US)                         | Cell culture | 20 ng/mL           |
| SP600125                 | 1496          | TOCRIS (Bristol, UK)                         | Cell culture | 50 nmol/L          |
| Humulin-R (Insulin)      | 872492        | Eli Lilly Japan (Hyogo, JP)                  | Cell culture | 1.0 unit/mL        |
| Transferrin              | 201-18081     | Fujifilm Wako Pure Chemical Corp (Tokyo, JP) | Cell culture | 2.5 mg/mL          |
| Putrescine               | 100441        | MP Biomedicals (CA, US)                      | Cell culture | 50 mmol/L          |
| Selenium                 | 196-12622     | Fujifilm Wako Pure Chemical Corp (Tokyo, JP) | Cell culture | 15 µmol/L          |
| Progesterone             | 160-24511     | Fujifilm Wako Pure Chemical Corp (Tokyo, JP) | Cell culture | 10 µmol/L          |
| B-27™                    | A3653401      | Thermo Fisher Scientific (MA, USA)           | Cell culture | 2%                 |
| LysoTracker™ Red         | L7528         | Thermo Fisher Scientific (MA, USA)           | Cell culture | 100 nmol/L         |
| Poly-L-lysine            | A21202        | Thermo Fisher Scientific (MA, USA)           | Cell culture | 10 µg/mL           |
| Laminin                  | A21203        | Thermo Fisher Scientific (MA, USA)           | Cell culture | 10 µg/mL           |
| Collagenase              | CLS-3         | Worthington Biochemicals (NJ, US)            | Cell culture | 2.0 mg/mL          |
| Dispase                  | 354235        | Corning, Corning (NY, US)                    | Cell culture | 50 unit/mL         |
| Percoll PLUS™            | 28-9038-34 AA | GE Healthcare Bio-Sciences Corp (IL, US)     | Cell culture | 30%                |
| DMEM High glucose        | 043-30085     | Fujifilm Wako Pure Chemical Corp (Tokyo, JP) | Cell culture |                    |
| DMEM/F-12                | 048-29785     | Fujifilm Wako Pure Chemical Corp (Tokyo, JP) | Cell culture |                    |

**Supplementary Table 2. List of chemicals and Reagents used in this study (continued)**

| Chemical / Reagent name            | Catalog No. | Vendor                                       | Experiments  | Concentration |
|------------------------------------|-------------|----------------------------------------------|--------------|---------------|
| Bovine serum albumin               | 017-15141   | Fujifilm Wako Pure Chemical Corp (Tokyo, JP) | Cell culture |               |
| Streptozotocin (STZ)               | S0130       | Merck KGaA (Darmstadt, Germany)              | Animal study | 100 mg/kg     |
| Hydroxystilbamidine (Fluoro-gold™) | 80014       | Biotium Inc (CA, US)                         | Animal study | 5%            |

**Supplementary Table 3. List of Antibodies used in this study**

| Antibody name                          | Species | Catalog No. | Vendor                                     | Experiments | Dilutions               |
|----------------------------------------|---------|-------------|--------------------------------------------|-------------|-------------------------|
| CD68                                   | Rabbit  | ab125212    | Abcam plc. (Cambridge, UK)                 | IF          | 1:500                   |
| iNOS                                   | Rabbit  | ab15323     | Abcam plc. (Cambridge, UK)                 | IF, IC      | 1:100 (IF, IC)          |
| Mannose Receptor (CD206)               | Rabbit  | ab64693     | Abcam plc. (Cambridge, UK)                 | IF          | 1:200                   |
| Protein gene product 9.5 (PGP 9.5)     | Rabbit  | Z5116       | Agilent (CA, USA)                          | IF          | 1:500                   |
| Cytokeratin 5/6 (CK 5/6)               | Mouse   | M7237       | Agilent (CA, USA)                          | IF          | 1:200                   |
| Fluoro-gold                            | Rabbit  | AB153-I     | Merck KGaA (Darmstadt, Germany)            | IF          | 1:200                   |
| $\beta$ -tubulin III                   | Mouse   | sc-51670    | Santa Cruz biotechnology, Inc. (CA, USA)   | IF, IC      | 1:200 (IF, IC)          |
| Phospho-JNK                            | Rabbit  | #9251       | Cell Signaling Technology, Inc., (MA, USA) | WB, IC      | 1:4000 (WB), 1:100 (IC) |
| Total JNK                              | Rabbit  | sc-474      | Santa Cruz Biotechnology, Inc., (TX, USA)  | WB          | 1:2000                  |
| Phospho-AKT                            | Rabbit  | #4060       | Cell Signaling Technology, Inc. (MA, USA)  | WB, IC      | 1:4000 (WB), 1:100 (IC) |
| Total AKT                              | Rabbit  | #4685       | Cell Signaling Technology, Inc. (MA, USA)  | WB          | 1:4000                  |
| Phospho-GSK3 $\beta$                   | Rabbit  | #9322       | Cell Signaling Technology, Inc. (MA, USA)  | WB, IC      | 1:4000 (WB), 1:100 (IC) |
| Total GSK3 $\beta$                     | Rabbit  | #27C10      | Cell Signaling Technology, Inc. (MA, USA)  | WB          | 1:1000                  |
| $\beta$ -actin                         | Rabbit  | sc-1615     | Santa Cruz Biotechnology, Inc. (MA, USA)   | WB          | 1:1000                  |
| Alexa fluore 488 anti-mouse IgG (H+L)  | Donkey  | A21202      | Thermo Fisher Scientific (MA, USA)         | IF          | 1:500                   |
| Alexa fluore 594 anti-mouse IgG (H+L)  | Donkey  | A21203      | Thermo Fisher Scientific (MA, USA)         | IF          | 1:500                   |
| Alexa fluore 647 anti-rabbit IgG (H+L) | Donkey  | A31573      | Thermo Fisher Scientific (MA, USA)         | IF          | 1:500                   |

IF; immunofluorescence, IC; immunocytochemistry, WB; Western blotting.

## Supplementary Figure 1

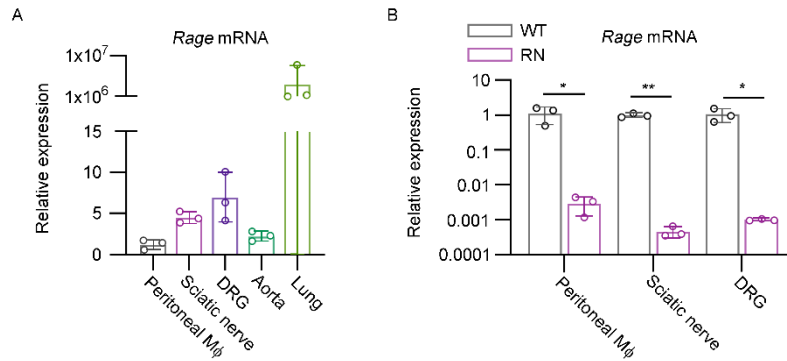

### Supplementary Figure 1: mRNA expression of RAGE in various organs.

(A) Relative mRNA expression of *Rage* in peritoneal macrophages, sciatic nerve, DRG, lung and aorta from wild-type mice (WT). (B) Relative mRNA expression of *Rage* in each organ from WT compared to RAGE-null mice (RN). Data are presented as the mean  $\pm$  SD;  $n = 3$  mice / group. Statistical analysis was performed by Student's unpaired t test.  $P$  Values  $< 0.05$  were considered significant; \*  $P < 0.05$ , \*\*  $P < 0.01$ .

## Supplementary Figure 2

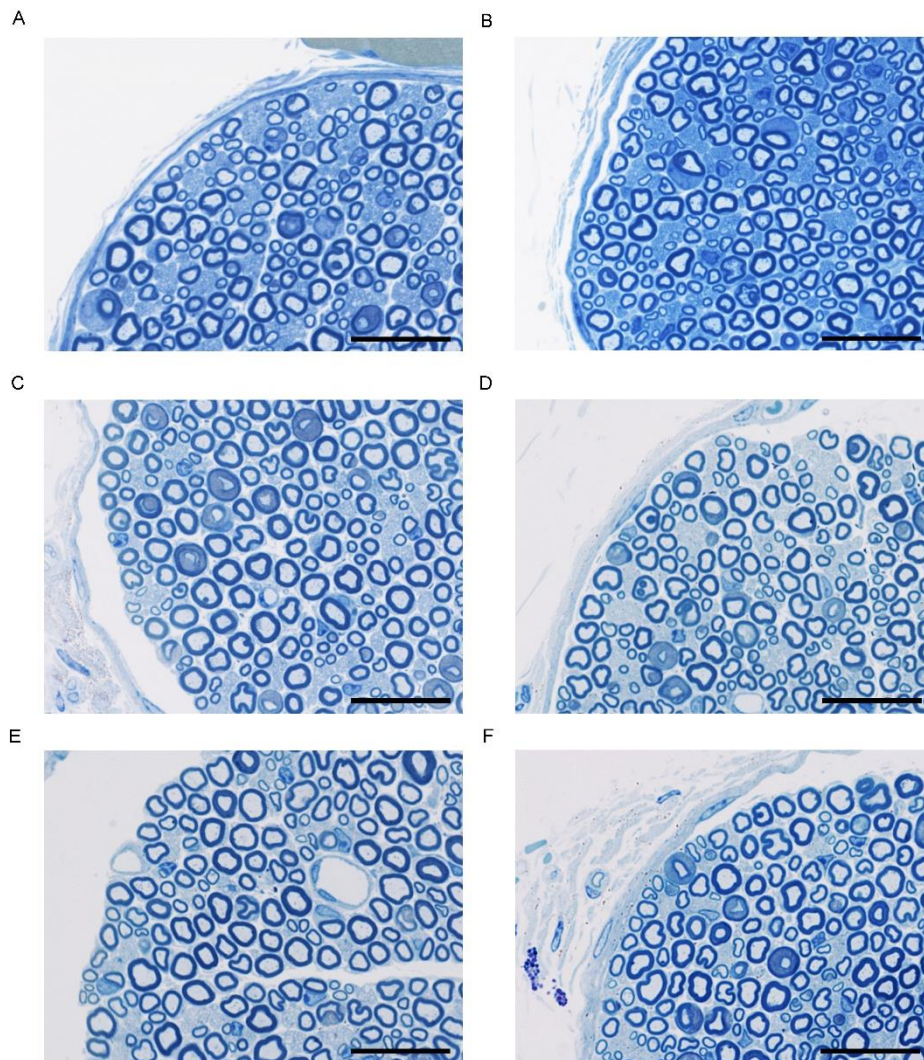

### Supplementary Figure 2, related to Supplementary Table 3: Pathological evaluation of sciatic nerves.

Representative images of the sciatic nerves embedded in epoxy resin and stained with toluidine blue for 8 weeks of age non-diabetic wild-type mice (WT-non-DM) (A), non-diabetic RAGE null mice (RN-non-DM) (B), 16 weeks of age WT-non-DM (C), diabetic wild type mice (D), RN-non-DM (E) and diabetic RAGE null mice (F). scale bar = 50 μm.

Supplementary Figure 3

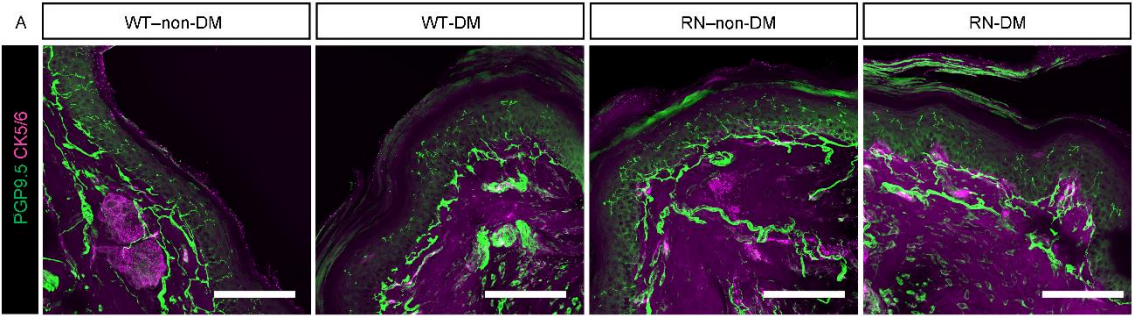

**Supplementary Figure 3, related to Table 1: Intra epidermal nerve fibers of mice foot-pad skin.**

(A) Representative images of the skin showing intra-epidermal nerve fibers immunostained for PGP9.5 and Cytokeratin 5/6 (CK5/6) (scale bar = 100  $\mu$ m). Non-diabetic wild-type mice (WT-non-DM), diabetic wild type mice (WT-DM), non-diabetic RAGE null mice (RN-non-DM) and diabetic RAGE null mice (RN-DM).

## Supplementary Figure 4

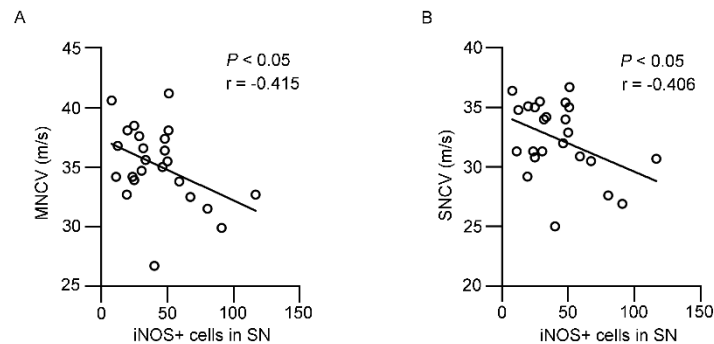

**Supplementary Figure 4, related to Table 1 and Figure 1: The correlation between NCVs and iNOS positive macrophages in the sciatic nerves.**

(A) The correlation between motor nerve conduction velocities (MNCV) or sensory nerve conduction velocities (SNCV) and iNOS positive macrophages in the sciatic nerves (SN) of the experimental mice. Statistical analysis was performed by Pearson's correlation analysis for C.  $P$  Values  $< 0.05$  were considered significant. NCVs, nerve conduction velocities.



## Supplementary Figure 5

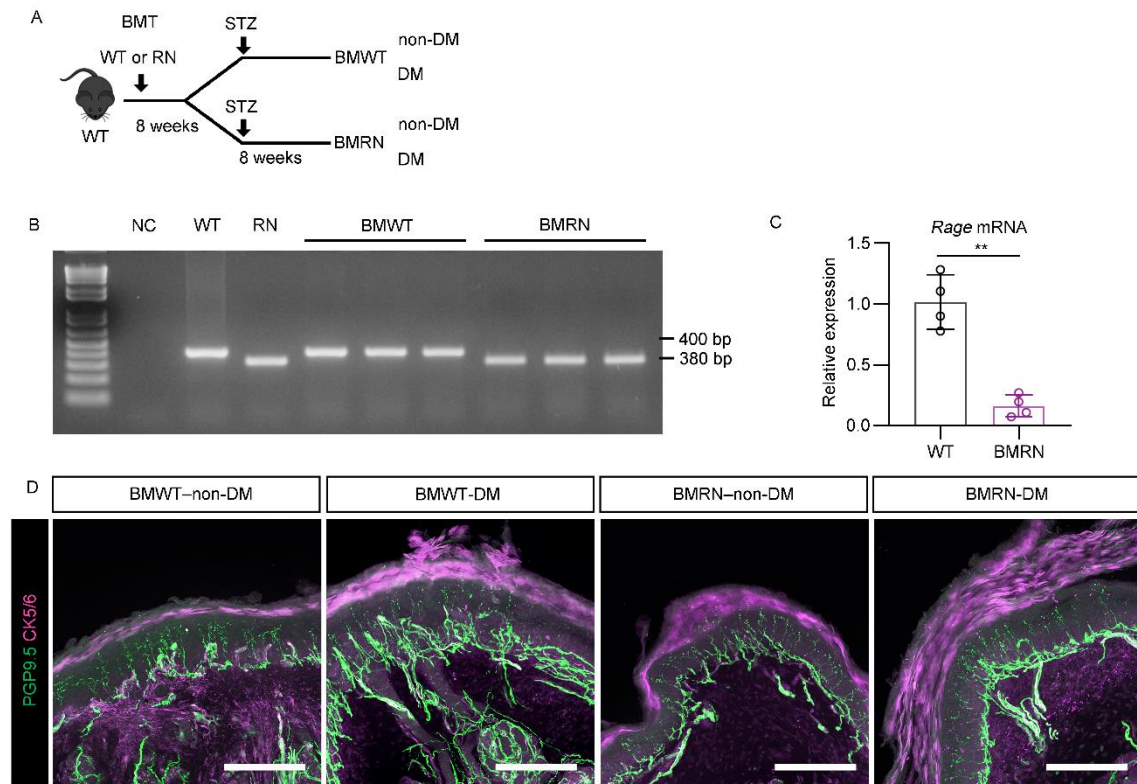

**Supplementary Figure 5, related to Table 2: The method of bone marrow transplantation and the evaluation of the genotype of mice and intra epidermal nerve fibers of mice foot-pad skin.**

(A) Flowchart of the bone marrow transplantation (BMT) and the induction of diabetes. Non-diabetic wild-type mice with BM from WT mice (BMWT–non-DM), diabetic wild type mice with BM from WT mice (BMWT-DM), non-diabetic wild-type mice with BM from RAGE null mice (BMRN–non-DM) and diabetic wild-type mice with BM from RAGE null mice (BMRN-DM). (B) Genotyping PCR of genome DNA extracted from mice whole blood. Negative control (NC). (C) Relative mRNA expressions of RAGE in the bone marrow from WT and BMRN. (D) Representative images of the skin showing intra-epidermal nerve fibers immunostained for PGP9.5 (scale bar = 100  $\mu$ m) and Cytokeratin 5/6 (CK5/6). Data are presented as the mean  $\pm$  SD; n= 4 mice / group for c. Statistical analysis were performed by Student's unpaired t test for c. *P* Values < 0.05 were considered significant; \* *P* < 0.05, \*\* *P* < 0.01.

## Supplementary Figure 6

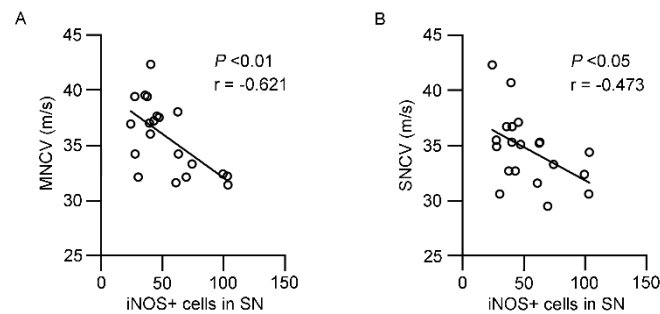

**Supplementary Figure 6, related to Table 2 and Figure 4: The correlation between NCVs and iNOS positive macrophages in the SN of bone marrow transplanted mice.**

(A) The correlation between motor nerve conduction velocities (MNCV) or sensory nerve conduction velocities (SNCV) (B) and iNOS positive macrophages in the sciatic nerves (SN) of bone marrow transplanted mice. Statistical analysis was performed by Pearson's correlation analysis for C.  $P$  Values  $< 0.05$  were considered significant. NCVs, nerve conduction velocities.

## Supplementary Figure 7

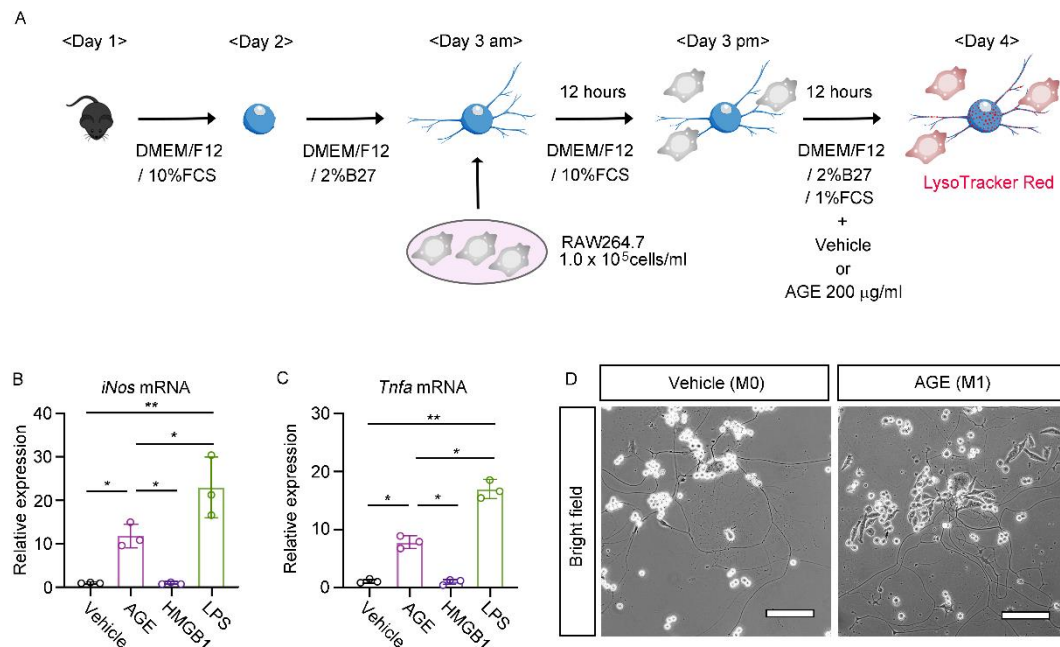

### Supplementary Figure 7: AGE stimulation polarizes RAW264.7 macrophages into the inflammatory phenotype.

(A) The methodological procedure of coculture system of the DRG neuron and RAW264.7 cells was shown. (B-C) Relative mRNA expression of *iNOS* (B) and *Tnfa* (C) in RAW264.7 cells stimulated with 200  $\mu$ g /mL BSA (vehicle), 200  $\mu$ g /mL AGE, 1.0  $\mu$ g /mL high mobility group box-1 (HMGB1) or 1.0  $\mu$ g/mL LPS. (D) Bright field images of direct coculture of DRG neuron and RAW264.7 cells, which were incubated with 200  $\mu$ g/mL BSA (vehicle) (M0) or 200  $\mu$ g /mL AGE (M1) for 12 hours (scale bar: 100  $\mu$ m). Stimulation with AGE changed the morphology of RAW264.7 into spindle or amoeboid shapes compared to vehicle. Data are presented as the mean  $\pm$  SD;  $n = 3$  / group. Statistical analysis was performed by one-way ANOVA with Turkey's multiple-comparison test.  $P$  Values  $< 0.05$  were considered significant; \*  $P < 0.05$ , \*\*  $P < 0.01$ .

## Supplementary Figure 8

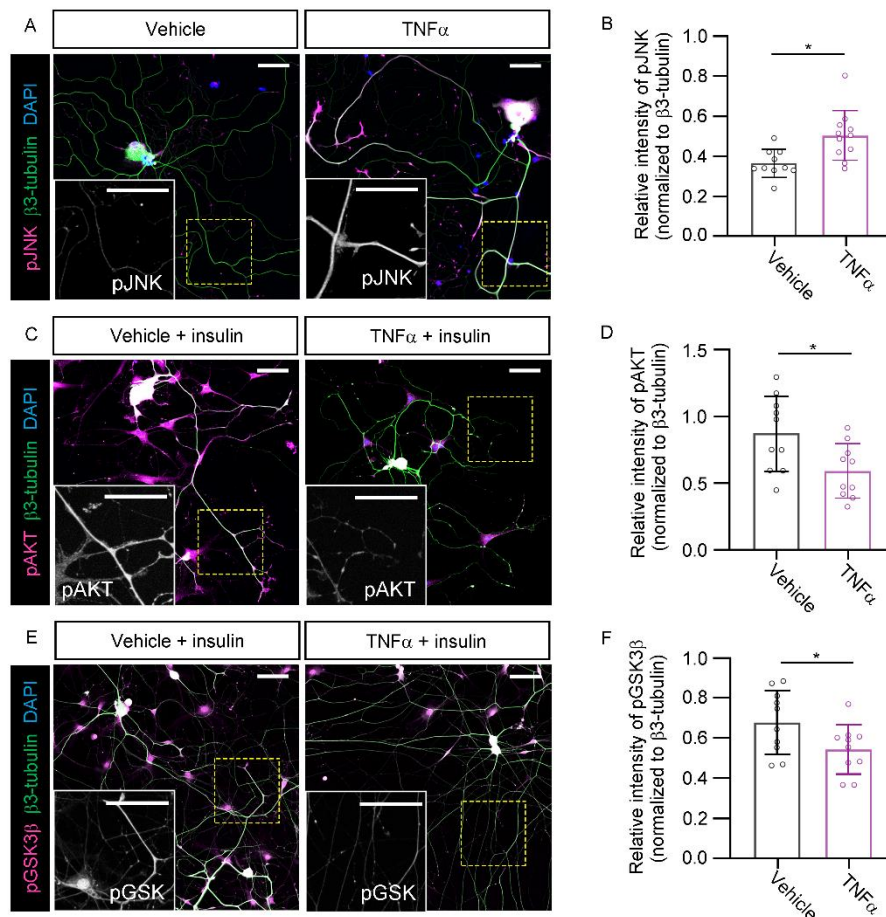

**Supplementary Figure 8, related to Figure 7 and 8: in vitro assessment of DRG neurons co-cultured with RAW264.7 macrophages or stimulated with  $TNF\alpha$ .**

Immunofluorescent images showing phosphorylation of JNK (A), AKT (C) and GSK3 $\beta$  (E) in DRG neurons treated with PBS containing 0.1% BSA (Vehicle) or 20 ng/mL  $TNF\alpha$  for 20 minutes (A) and subsequently treated with 1.0 U/mL insulin for 10 minutes (C and E). Neurons were counterstained for  $\beta$ 3-tubulin (scale bar: 50  $\mu$ m). Relative fluorointensity of phosho-JNK (B), phosho-AKT (D) and phosho-GSK3 $\beta$  (F) normalized to  $\beta$ 3-tubulin in axons. Data are presented as the mean  $\pm$  SD,  $n = 10$  fields ( $\times 20$ ) /group from 3 independent experiments. Statistical analysis was performed by Student's unpaired t test.  $P$  Values  $< 0.05$  were considered significant; \*  $P < 0.05$ .

## Supplementary Figure 9

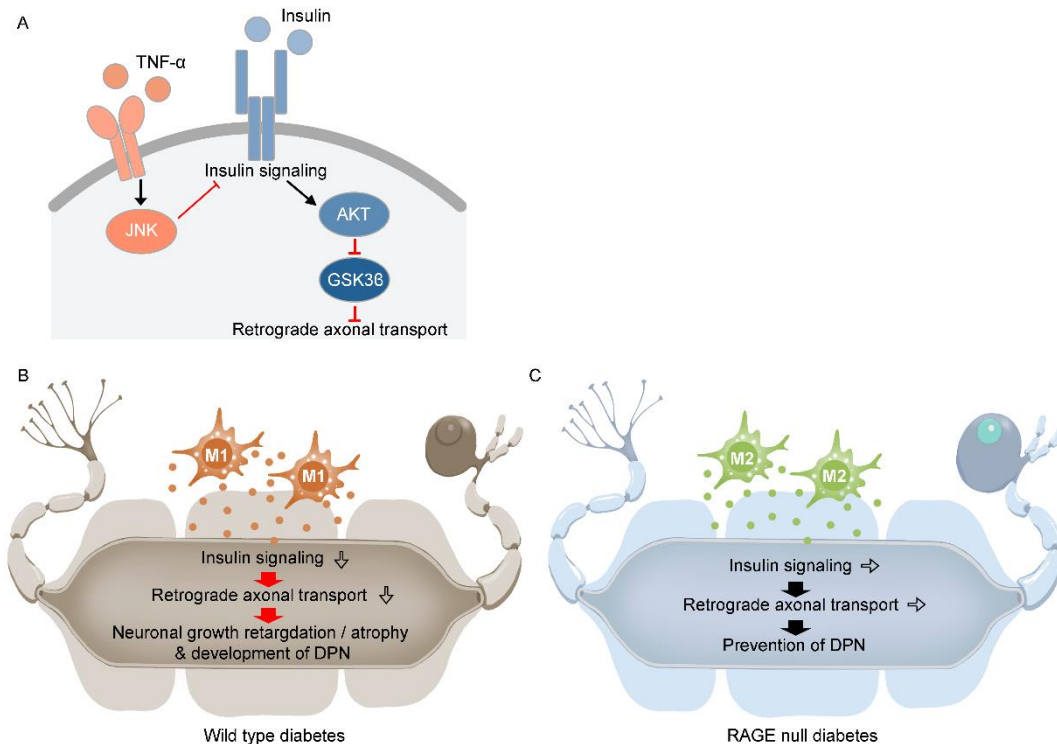

### Supplementary Figure 9: A proposed model for the role of RAGE in early stage of DPN in type 1 diabetes.

(A) Associations between Insulin signaling and retrograde axonal transport in the axon of DRG neurons. (B) Hyperglycemia and AGE formation triggers M1 macrophage-associated local inflammation in the sciatic nerves (SN), which induces resistance of the insulin signaling and the decrease of retrograde axonal transport, resulting in neuronal growth retardation/atrophy and development of DPN of type 1 diabetes. (C) Deletion of RAGE in macrophages skews the polarity towards M2 macrophage phenotype in diabetic condition. Anti-inflammatory environment ameliorates abnormal changes in the SN and prevents the onset of DPN.

**Supplementary Video 1: Transport in DRG neuron monocultures after AGE stimulation.**

DRG neurons were cultured in chamber slides for 2 days. Axons were pretreated with 200 µg/mL AGE for 12 hours and LysoTracker Red for 1 hour. Time-lapse images of neurons were captured every 2 seconds for 4 minutes. The video frame rate is 10 frames per second.

**Supplementary Video 2: Transport in DRG neuron-RAW264.7 cell cocultures after vesicle stimulation.**

DRG neurons were monocultured in chamber slides for 24 hours. Subsequently, RAW264.7 cells were seeded onto DRG neurons at  $1.0 \times 10^5$  cells/mL. The cells were cocultured for 12 hours. Axons were pretreated with 200 µg/mL BSA for 12 hours and LysoTracker Red for 1 hour. Time-lapse images of neurons were captured every 2 seconds for 4 minutes. The video frame rate is 10 frames per second.

**Supplementary Video 3: Transport in DRG neuron-RAW264.7 cell cocultures after AGE stimulation.**

DRG neurons were monocultured in chamber slides for 24 hours. Subsequently, RAW264.7 cells were seeded onto DRG neurons at  $1.0 \times 10^5$  cells/mL. The cells were cocultured for 12 hours. Axons were pretreated with 200 µg/mL AGE for 12 hours and

LysoTracker Red for 1 hour. Time-lapse images of neurons were captured every 2 seconds for 4 minutes. The video frame rate is 10 frames per second.

**Supplementary Video 4: Transport in DRG neuron monocultures after insulin withdrawal.**

DRG neurons were cultured in chamber slides for 2 days. Axons were pretreated with 2.5 mg/mL Transferrin, 50 mmol/L Putrescine, 15  $\mu$ mol/L Selenium, 10  $\mu$ mol/L Progesterone without B27<sup>TM</sup> supplementation, and LysoTracker Red for 1 hour. Time-lapse images of neurons were captured every 2 seconds for 4 minutes. The video frame rate is 10 frames per second.

**Supplementary Video 5: Transport in DRG neuron monocultures after insulin stimulation.**

DRG neurons were cultured in chamber slides for 2 days. Axons were pretreated with 2.5 mg/mL Transferrin, 50 mmol/L Putrescine, 15  $\mu$ mol/L Selenium, 10  $\mu$ mol/L Progesterone, 1.0 U/mL Humulin-R without B27<sup>TM</sup> supplementation, and LysoTracker Red for 1 hour. Time-lapse images of neurons were captured every 2 seconds for 4 minutes. The video frame rate is 10 frames per second.

**Supplementary Video 6: Transport in DRG neuron monocultures under baseline conditions.**

DRG neurons were cultured in chamber slides for 2 days. Axons were pretreated with LysoTracker Red for 1 hour and PBS containing 0.1% BSA (Vehicle) for 20 minutes. Time-lapse images of neurons were captured every 2 seconds for 4 minutes. The video frame rate is 10 frames per second.

**Supplementary Video 7: Transport in DRG neuron monocultures upon TNF $\alpha$  stimulation.**

DRG neurons were cultured in chamber slides for 2 days. Axons were pretreated with LysoTracker Red for 1 hour and 20 ng/mL TNF $\alpha$  for 20 minutes. Time-lapse images of neurons were captured every 2 seconds for 4 minutes. The video frame rate is 10 frames per second.

**Supplementary Video 8: Transport in DRG neuron monocultures upon TNF $\alpha$  stimulation in the presence of SP600125.**

DRG neurons were cultured in chamber slides for 2 days. Axons were pretreated with 50 nmol/L SP600125 (JNK inhibitor) and LysoTracker Red for 1 hour and 20 ng/mL TNF $\alpha$  with 50 nmol/L SP600125 for 20 minutes. Time-lapse images of neurons were captured



every 2 seconds for 4 minutes. The video frame rate is 10 frames per second.

**Supplementary Video 9: Transport in DRG neuron monocultures upon stimulation with 300 nmol/L BMS-754807.**

DRG neurons were cultured in chamber slides for 2 days. Axons were pretreated with 300 nmol/L BMS-754807 (insulin receptor/IGF-1 receptor antagonist) and LysoTracker Red for 1 hour. Time-lapse images of neurons were captured every 2 s for 4 minutes. The video frame rate is 10 frames per second.

**Supplementary Video 10: Transport in DRG neuron monocultures upon 500 nmol/L BMS-754807 stimulation.**

DRG neurons were cultured in chamber slides for 2 days. Axons were pretreated with 500 nmol/L BMS-754807 (insulin receptor/IGF-1 receptor antagonist) and LysoTracker Red for 1 hour. Time-lapse images of neurons were captured every 2 s for 4 minutes. The video frame rate is 10 frames per second.
